# Supplementary material for: A physicochemical perspective of aging from single-cell analysis of pH, macromolecular and organellar crowding in yeast
Source: eLife. 2020 Sep 29;9:e54707. doi: 10.7554/eLife.54707 (PMC7556870; doi:10.7554/eLife.54707)
Supplement: Figure 1—source data 1. [file elife-54707-fig1-data1.xlsx]

## Sheet: pHluorin calibration
cell #	pH 5	pH 5.5	pH 6	pH 6.5	pH 7	pH 7.5	pH 8
1	0.286172	0.307864	0.401335	0.552329	0.64786	1.02079	1.16098
2	0.278865	0.296365	0.375726	0.548018	0.657534	1.05005	1.17318
3	0.248068	0.304662	0.405386	0.555889	0.619066	1.01952	1.11963
4	0.256291	0.30828	0.416409	0.527408	0.592539	1.02342	1.12762
5	0.256212	0.309141	0.396387	0.540903	0.611526	0.994227	1.14671
6	0.259789	0.292911	0.39519	0.545586	0.595433	1.00601	1.1936
7	0.26068	0.281902	0.391993	0.539364	0.571199	0.988592	1.00726
8	0.26078	0.299242	0.388279	0.531304	0.590172	1.00409	1.16213
9	0.255651	0.294894	0.412978	0.534061	0.663269	0.982697	1.11383
10	0.258057	0.30021	0.415682	0.546056	0.635293	0.996834	1.09174
11	0.257776	0.293529	0.405938	0.526413	0.622439	0.9223	1.08957
12	0.281131	0.322728	0.412435	0.522221	0.607644	0.900118	1.08676
13	0.281187	0.322815	0.392013	0.532617	0.647597	0.883506	1.14395
14	0.274508	0.316828	0.418074	0.538764	0.637379	0.921257	1.09239
15	0.262214	0.312913	0.416657	0.54234	0.612206	0.949262	1.17092
16	0.266455	0.318937	0.411301	0.544366	0.658542	0.93925	1.10917
17	0.264553	0.320485	0.419041	0.526466	0.633995	0.985071	1.08365
18	0.269203	0.326377	0.413609	0.589759	0.612352	0.958931	1.05158
19	0.275922	0.314753	0.376901	0.615956	0.641559	0.972094	1.14198
20	0.25971	0.315095	0.392254	0.619535	0.626691	0.975997	1.16488

## Sheet: pH in ageing
	F390/F475	pHluorin ratio										Replicative age											pH values
cell #	0 h	10	20	30	40	50	60	70	80		cell #	0 h	10	20	30	40	50	60	70	80		cell #	0 h	10	20	30	40	50	60	70	80
1	0.835736	0.869318	0.805993	0.73802	0.712473	0.668815	0.6088	0.640921			1	0	7	11	13	14	14	14	14			1	7.38869	7.46678	7.31686	7.14222	7.07239	6.94705	6.76069	6.86261
2	0.849196	0.98094	0.950925	0.93583	0.725821	0.755039					2	0	9	17	24	24	24					2	7.42036	7.70623	7.64463	7.61291	7.10918	7.18741
3	0.867728	0.977873	0.915957	0.909163	0.889875	0.897673					3	0	10	18	21	22	22					3	7.46315	7.70002	7.57037	7.55561	7.51311	7.5304
4	0.953062	0.950928	0.942658	0.869881	0.813254	0.822929	0.747671	0.69333	0.810943		4	0	9	17	23	25	27	28	30	31		4	7.64908	7.64464	7.62732	7.46806	7.33464	7.35808	7.16797	7.01841	7.32899
5	0.953183	0.991451	0.986414	0.897416							5	0	10	16	20							5	7.64933	7.72735	7.71726	7.52983
6	1.00862	0.944502									6	0	9									6	7.76139	7.6312
7	0.983387	0.927695	0.939905	0.855137	0.839885	0.806605	0.635911	0.563375			7	0	9	17	23	30	31	31	31			7	7.71116	7.5956	7.62152	7.43418	7.3985	7.31836	6.84706	6.60699
8	0.969356	0.883261	0.824755	0.749805	0.677084						8	0	5	9	12	13						8	7.68268	7.49832	7.36247	7.17362	6.97141
9	0.999342	0.971018	0.941365	0.906555	0.881448						9	0	10	17	22	23						9	7.74307	7.68608	7.6246	7.54992	7.49424
10	0.946013	0.931228	0.883667	0.923849							10	0	10	18	26							10	7.63436	7.60314	7.49923	7.58737
11	0.947119	0.923962	0.900036	0.811922	0.768434	0.769693	0.695211	0.651248	0.595252		11	0	9	17	22	24	26	26	26	26		11	7.63668	7.58761	7.53561	7.33139	7.22227	7.22551	7.02378	6.89429	6.71609
12	0.994111	0.97216	0.971911	0.938137	0.926934	0.888486	0.70656				12	0	10	19	27	33	36	36				12	7.73266	7.68841	7.6879	7.61779	7.59398	7.51001	7.05587
13	0.968668	0.914271	0.860625	0.838453	0.801038						13	0	10	16	21	23						13	7.68127	7.56671	7.44686	7.39512	7.30463
14	0.980003	0.968583	0.938909	0.901609							14	0	9	18	26							14	7.70433	7.6811	7.61942	7.53907
15	1.02265	0.959423	0.936719	0.880705	0.862303	0.793065	0.613422	0.534598	0.446482		15	0	11	17	20	21	22	23	24	24		15	7.78876	7.66226	7.61479	7.49257	7.45072	7.28481	6.77569	6.50306	6.14604
16	0.981656	0.953562	0.938913	0.921412	0.912828	0.856292					16	0	9	18	26	29	30					16	7.70767	7.65012	7.61943	7.58213	7.56358	7.43685
17	0.981809	0.936639	0.949616	0.93775	0.910123	0.866544	0.879152	0.848634	0.778643		17	0	10	19	28	36	42	45	47	47		17	7.70798	7.61462	7.6419	7.61697	7.5577	7.46044	7.48907	7.41905	7.24843
18	0.931181	0.912048	0.917599	0.90334	0.866252	0.877213					18	0	9	18	26	30	30	32				18	7.60304	7.56189	7.57392	7.54287	7.45977	7.4847
19	1.00926	0.985752	0.948006	0.909575	0.858581	0.819392	0.843418	0.810123	0.769262		19	0	9	16	23	27	29	31	33	35		19	7.76264	7.71593	7.63854	7.55651	7.44214	7.34954	7.40682	7.32699	7.2244
20	1.01445	0.984237	0.910411								20	0	10	17								20	7.77281	7.71288	7.55833
21	0.972876	0.89675	0.86986								21	0	8	11								21	7.68987	7.52836	7.46801
22	0.999947	0.955857	0.885991	0.856085	0.813779	0.799496	0.775467	0.695963			22	0	8	13	17	19	20	21	21			22	7.74427	7.65488	7.50443	7.43637	7.33591	7.30082	7.24033	7.02592
23	1.02996	0.938423	0.91405	0.824199	0.821804	0.712146	0.392639				23	0	9	14	17	18	19	19				23	7.80289	7.6184	7.56624	7.36113	7.35537	7.07148	5.89132
24	1.0459	1.01831	1.00825	0.963175	0.944356						24	0	11	19	26	29						24	7.83332	7.78034	7.76065	7.67	7.63089
25	0.936986	0.913841	0.894434	0.887272	0.883688	0.842547					25	0	9	17	22	23	23					25	7.61536	7.56578	7.52323	7.5073	7.49928	7.40478
26	1.00558	0.958742	0.929319	0.900366							26	0	10	17	21							26	7.75541	7.66086	7.59907	7.53634
27	1.00506	0.963661	0.864865	0.791788	0.749399	0.689211	0.732025				27	0	9	15	17	17	17	17				27	7.75437	7.671	7.4566	7.28161	7.17255	7.00659	7.12606
28	0.945227	0.963265	0.927763	0.906209	0.920391	0.937943					28	0	10	17	23	26	28					28	7.63272	7.67019	7.59575	7.54916	7.57994	7.61738
29	0.965042	0.908712	0.868352	0.77866	0.761325	0.725064	0.720476	0.754656			29	0	8	14	18	19	20	21	23			29	7.67384	7.55463	7.46457	7.24847	7.20385	7.10712	7.09453	7.18641
30	0.996858	0.958742	0.942065	0.953077	0.899873	0.861601					30	0	10	18	23	24	24					30	7.73813	7.66086	7.62607	7.64911	7.53525	7.4491

## Sheet: Cytosolic acidity
F475/F390	time points (h)
cell #	0	1	2	3	4	5	6	7	8	9	10	11	12	13	14	15	16	17	18	19	20	21	22	23	24	25	26	27	28	29	30	31	32	33	34	35	36	37	38	39	40	41	42	43	44	45	46	47	48
1	0.878762	1.05863	1.02408	1.05629	1.11255	1.15912	1.12565	1.17671	1.11399	1.10307	1.13178	1.1507	1.14493	1.18656	1.16609	1.20609	1.13095	1.13381	1.1313	1.1914	1.18017	1.11752	1.16833	1.16475	1.21191	1.2026	1.2058	1.22428	1.24063	1.25995	1.22121	1.25039	1.29546	1.319	1.31607	1.31789	1.32907	1.33545	1.35197	1.36391	1.3791	1.36924	1.38215
2	0.908048	1.06731	1.04836	1.10773	1.16016	1.11525	1.16835	1.16057	1.18219	1.19278	1.20101	1.20221	1.2493	1.25927	1.27627	1.28498	1.29114	1.33867	1.36673	1.35252	1.38088	1.46574	1.4618	1.40618	1.46344	1.47331	1.48731	1.50929	1.51027	1.51209	1.50347	1.50639	1.50463	1.48732	1.47442	1.42418	1.46944	1.5099	1.51107	1.6346	1.69238	1.78285	1.8602	1.94685	2.01257	2.12112	2.12577	2.15489	2.22544
3	0.854538	1.00925	1.01933	1.03774	1.04004	1.09465	1.07267	1.07475	1.06846	1.1047	1.1306	1.07992	1.15133	1.08077	1.10157	1.10393	1.14473	1.13931	1.13989	1.09111	1.1032	1.11959	1.10964	1.17558	1.18666	1.19682	1.21421	1.21399	1.21078	1.21518	1.22794	1.22297	1.24001	1.24952	1.26778	1.27399	1.28112	1.29382	1.30582	1.32389	1.373	1.39491	1.40932	1.41527	1.43416	1.46215	1.46601	1.44877	1.45572
4	0.964395	1.0604	1.09661	1.03732	1.12229	1.10737	1.17077	1.12082	1.15481	1.24874	1.20048	1.23883	1.33616	1.4286	1.48874	1.56587	1.64622	1.69552	1.73378	1.78515	1.82977	1.83651	1.91954	1.92879	1.94408	1.96713	2.00221	2.0442	2.08818	2.18278	2.22095	2.26901	2.33918	2.38177	2.4589	2.51795	2.57421	2.63594	2.66736	2.73271	2.78301	2.83179	2.87602	2.89005	2.93143
5	0.902827	1.03734	1.10609	1.13024	1.16265	1.17526	1.18587	1.19079	1.17851	1.18341	1.18244	1.18233	1.18406	1.18061	1.14819	1.14528	1.18665	1.102	1.17806	1.15323	1.12896	1.13572	1.18232	1.17969	1.17658	1.17048	1.18713	1.19579	1.1828	1.1944	1.15217	1.19179	1.20042	1.18427	1.19722	1.20651	1.20437	1.19847	1.19179	1.20301	1.19379	1.19477	1.19644	1.18745	1.21309	1.2103	1.22797	1.20859	1.22242
6	0.880404	1.04537	1.1391	1.17204	1.1408	1.21497	1.188	1.24521	1.24615	1.23507	1.247	1.21931	1.219	1.25144	1.25117	1.27176	1.26896	1.27908	1.28362	1.29407	1.34654	1.37593	1.40971	1.4258	1.45198	1.47417	1.51525	1.54171	1.62009	1.66768	1.74495	1.84705	1.95066	2.03144	2.10393	2.21618	2.26844	2.3451	2.40118	2.41563
7	0.903986	1.0191	1.12532	1.15393	1.09659	1.10341	1.11496	1.18842	1.20166	1.20683	1.19787	1.21981	1.18245	1.23578	1.24017	1.2743	1.27681	1.28854	1.29207	1.3047	1.31775	1.34742	1.35854	1.37428	1.41819	1.43996	1.44553	1.48616	1.48082
8	0.882529	1.01912	1.03913	1.0774	1.09879	1.16359	1.1274	1.19088	1.16247	1.24782	1.23515	1.27553	1.30465	1.33136	1.37235	1.42332	1.45283	1.48068	1.51269	1.5301	1.53774	1.56741	1.59395	1.60553	1.62655	1.64366	1.66485	1.66638	1.66164	1.63433	1.60549	1.58761	1.52865	1.53203	1.56635	1.5648	1.58518	1.59009	1.59836	1.60107	1.62945	1.67705	1.72292	1.74114	1.76383
9	0.877496	0.96599	1.00101	1.09443	1.16394	1.16336	1.15775	1.13924	1.13388	1.14002	1.12164	1.12488	1.1352	1.12294	1.13275	1.15009	1.19462	1.18841	1.18923	1.19661	1.18527	1.25464	1.3837	1.49218	1.60709	1.72003	1.8197	1.92147	2.00223	2.11611
10	0.889428	1.01416	1.09689	1.1147	1.14366	1.14684	1.17969	1.19675	1.20389	1.22188	1.22629	1.22774	1.23349	1.234	1.24522	1.24385	1.31321	1.33415	1.31634	1.35295	1.35903	1.39537	1.39608	1.39295	1.43113	1.4721	1.51971	1.60854	1.60954	1.653	1.71206	1.753	1.79831	1.84423	1.89251	1.93707	1.94525	2.01332	2.10328	2.15086	2.19364
11	0.908547	0.974797	1.01199	1.11502	1.14216	1.15897	1.17377	1.14418	1.09474	1.11189	1.15506	1.08466	1.07769	1.15383	1.19837	1.12536	1.18006	1.19716	1.17538	1.19917	1.2255	1.20111	1.21063	1.20886	1.22152	1.22237	1.22578	1.22345	1.27747	1.28467	1.28207	1.2912	1.31961	1.33662	1.35701	1.38489	1.41861	1.43036	1.44996	1.46068	1.49372	1.49359	1.4989	1.51588	1.52415	1.51839	1.51351	1.53267	1.54071
12	0.883716	0.973078	1.00993	1.031	1.10038	1.11015	1.06474	1.07518	1.08489	1.1172	1.12249	1.08929	1.09176	1.13802	1.10162	1.1214	1.19088	1.18064	1.16962	1.16063	1.18129	1.18366	1.13839	1.13407	1.14764	1.16782	1.18249	1.14724	1.15443	1.20066	1.19276	1.2247	1.21583	1.23469	1.25343	1.23572	1.24156	1.26263	1.30897	1.29665	1.30904	1.27754	1.27353	1.28208	1.27947	1.29273	1.31796	1.34586	1.3707
13	0.890529	0.97858	1.05945	1.07226	1.12804	1.10371	1.10697	1.14713	1.13666	1.12998	1.15177	1.11588	1.16704	1.15197	1.15737	1.14578	1.19414	1.15414	1.19645	1.21397	1.19677	1.18996	1.19316	1.16969	1.2283	1.18368	1.22405	1.26465	1.24846	1.25871	1.23066	1.2832	1.32472	1.34165	1.33973	1.36205	1.38583	1.41449	1.46099	1.49087	1.52209	1.5553	1.5854	1.63621	1.64446	1.70917	1.91788	1.89182	1.87118
14	0.919599	1.0331	1.07545	1.10479	1.11874	1.13373	1.13618	1.14475	1.15607	1.14095	1.12979	1.12603	1.12684	1.15798	1.1648	1.1545	1.16995	1.19087	1.25024	1.24	1.2598	1.29488	1.30947	1.31855	1.34308	1.42565	1.44771	1.47596	1.50747	1.5237	1.53557	1.50591	1.55803	1.67428	1.74171	1.81799	1.92336	1.97879	2.02021	2.09426	2.16843	2.2062	2.27952
15	0.870815	1.08285	1.09733	1.13749	1.15604	1.19973	1.23657	1.23994	1.2173	1.24308	1.27409	1.24505	1.22881	1.29085	1.2636	1.22868	1.29919	1.31039	1.33748	1.33376	1.38226	1.44226	1.44793	1.4835	1.49089	1.50764	1.5357	1.5666	1.56909	1.58529	1.62438	1.65975	1.67358	1.73158	1.77849	1.79471	1.8257	1.82665	1.791	1.75595	1.74669	1.75726	1.75517	1.78121	1.80583	1.81031	1.84343	1.89059	1.9172
16	0.92797	1.03416	1.08385	1.13291	1.16925	1.16068	1.18108	1.17626	1.17419	1.18036	1.1852	1.16773	1.17978	1.19497	1.18986	1.14814	1.17996	1.19159	1.20193	1.15953	1.21592	1.18344	1.21666	1.20399	1.21827	1.21867	1.22674	1.22615	1.25309	1.25929	1.25348	1.2418	1.24849	1.26926	1.30232	1.34968	1.37924	1.44042	1.49243	1.55492	1.63124	1.68884	1.76099	1.82523	1.93668	1.96965	2.05883	2.1059	2.16435
17	0.901914	1.03286	1.0594	1.09186	1.20825	1.24192	1.24703	1.27845	1.29899	1.31122	1.32545	1.30253	1.35682	1.30367	1.31948	1.34239	1.36829	1.38964	1.40107	1.3898	1.45281	1.49483	1.52121	1.54596	1.64746	1.70022	1.73087	1.77508	1.81381	1.8782	1.90832	1.95115	1.9923	2.01712	2.0359	2.05952
18	0.969349	1.04577	1.09738	1.165	1.13409	1.17835	1.15414	1.18339	1.18493	1.20589	1.17355	1.19067	1.207	1.18379	1.22327	1.21069	1.21476	1.19098	1.22206	1.23308	1.22954	1.25635	1.26873	1.24117	1.25017	1.30708	1.29934	1.30996	1.31883	1.34232	1.35111	1.37113	1.41525	1.45349	1.44279	1.45146	1.4824	1.52116	1.54517	1.51888	1.48415	1.47864	1.45942	1.45369	1.47857	1.50933	1.52952
19	0.864276	0.997891	1.0698	1.11723	1.17666	1.14849	1.15705	1.18997	1.22481	1.17807	1.19836	1.18106	1.18904	1.20142	1.2187	1.24538	1.26279	1.24187	1.28014	1.27894	1.25462	1.28016	1.3174	1.37151	1.43953	1.42518	1.48523	1.48808	1.52023	1.5216	1.57803	1.6601	1.67204	1.69186	1.69166	1.70471	1.69045	1.74355	1.82475	1.84689	1.89985	1.92011	1.91984	1.95937	2.00208	1.99244	2.01555	2.0392	2.03923
20	0.885943	1.03103	1.0194	1.05628	1.06786	1.06814	1.06234	1.06977	1.07495	1.08064	1.09044	1.0865	1.06927	1.13238	1.08682	1.09748	1.1096	1.11256	1.15228	1.10935	1.09363	1.09651	1.14592	1.10293	1.14949	1.11397	1.19004	1.15827	1.21452	1.18692	1.22703	1.27416	1.21506	1.24538	1.3102	1.26205	1.32751	1.31046	1.3564	1.32563	1.35352	1.40735	1.35243	1.40867	1.43913	1.4001	1.3466	1.36441	1.41801
21	0.885511	1.02593	1.02257	1.05465	1.07102	1.06932	1.07251	1.081	1.09773	1.08585	1.0815	1.06724	1.1272	1.12924	1.11498	1.11604	1.1176	1.14149	1.13191	1.11712	1.07435	1.07393	1.13172	1.12624	1.12676	1.16447	1.12676	1.13325	1.15992	1.17627	1.1774	1.1611	1.15057	1.1597	1.141	1.14719	1.1729	1.16011	1.16087	1.14366	1.17107	1.15569	1.17333	1.21655	1.19417	1.18107	1.18061	1.19728	1.23313
22	0.919257	0.986165	1.02085	1.07558	1.13104	1.10355	1.07026	1.07009	1.10025	1.1107	1.08666	1.11835	1.07606	1.07551	1.08149	1.0957	1.10076	1.08846	1.09983	1.12283	1.11763	1.14963	1.11179	1.14991	1.15114	1.11376	1.16055	1.17391	1.22015	1.19714	1.17805	1.1832	1.19052	1.196	1.21715	1.22012	1.24876	1.22388	1.28999	1.3456	1.3084	1.31552	1.33607	1.27468	1.30789	1.31042	1.33911	1.27707	1.30716
23	0.884803	0.98266	1.03198	1.0658	1.08947	1.09588	1.09783	1.15456	1.10872	1.16471	1.10953	1.13494	1.15455	1.09807	1.14153	1.08736	1.15516	1.13918	1.15211	1.20846	1.18242	1.25452	1.23658	1.29362	1.29624	1.28631	1.28661	1.31373	1.34037	1.31123	1.34304	1.38043	1.39185	1.41761	1.45336	1.45204	1.46381	1.45604	1.45587	1.48575
24	0.89352	0.980054	1.01111	1.10037	1.05673	1.07818	1.09586	1.09872	1.09469	1.1366	1.10926	1.14276	1.09517	1.11725	1.11022	1.12562	1.17849	1.1449	1.18423	1.21605	1.19019	1.17029	1.23482	1.25331	1.264	1.31782	1.3402	1.30661	1.32179	1.3383	1.35676	1.40915	1.40931	1.40402	1.41964	1.45656	1.46873	1.45857	1.50139	1.51603	1.46698	1.51675	1.53515	1.55836	1.57602	1.58046	1.59882	1.61631	1.60179
25	0.865373	1.0577	1.07756	1.11101	1.12942	1.10155	1.10867	1.10275	1.12174	1.1109	1.11314	1.09641	1.11243	1.10928	1.10513	1.15862	1.13648	1.16183	1.16778	1.15327	1.11821	1.17105	1.16577	1.13906	1.18848	1.19419	1.18087	1.20274	1.19884	1.20473	1.20083	1.21442	1.16798	1.23389	1.22428	1.24299	1.25189	1.23786	1.24021	1.23866	1.25405	1.26391	1.28054	1.28118	1.29366	1.30859	1.30784	1.30146	1.30409
26	0.887829	0.983751	1.01756	1.04815	1.10619	1.11088	1.11969	1.12186	1.11596	1.1169	1.11117	1.13508	1.11107	1.14384	1.15512	1.14399	1.15587	1.17444	1.16133	1.15524	1.16375	1.16078	1.15796	1.14893	1.18091	1.1448	1.20285	1.18017	1.17149	1.17211	1.19346	1.18318	1.20261	1.21824	1.20534	1.27881	1.382	1.49572	1.61654	1.70182	1.8006	1.89135	1.9913	2.09121	2.138	2.21892	2.29161	2.34717	2.3933
27	0.943952	1.11576	1.18722	1.25682	1.30326	1.32719	1.3714	1.39068	1.39987	1.42441	1.43555	1.45749	1.44148	1.48326	1.50263	1.54215	1.56618	1.61477	1.6376	1.62584	1.62859	1.6415	1.63171	1.60086	1.61202	1.63957	1.66379	1.66524	1.67777	1.70394	1.76477	1.74796	1.74712	1.76387	1.79731	1.8444	1.87895	1.91096	1.92999	1.93958	1.93643	1.94845
28	0.907305	1.05933	1.10188	1.1355	1.23124	1.26718	1.27976	1.2644	1.29613	1.3792	1.38436	1.41834	1.45788	1.50471	1.56707	1.59911	1.62388	1.67885	1.75443	1.78339	1.81753	1.85008	1.8952	1.898	1.92754	1.95411	1.95691	1.98201	1.9924	2.01534	2.02613
29	0.874575	1.00483	1.04647	1.10668	1.16278	1.18418	1.2229	1.24116	1.20468	1.22373	1.20866	1.20179	1.23528	1.22143	1.21128	1.2022	1.20815	1.31167	1.2944	1.26863	1.22281	1.21451	1.22153	1.20879	1.2567	1.2474	1.28899	1.27028	1.28862	1.27405	1.29528	1.32633	1.32734	1.36808	1.39523	1.38629	1.41524	1.4467	1.46294	1.49094	1.50894	1.49638	1.4915	1.50371	1.51816	1.50206	1.46419	1.41462	1.53651
30	0.861572	1.02766	1.07431	1.09312	1.14433	1.14938	1.17758	1.1943	1.18148	1.20173	1.18579	1.16896	1.15997	1.20934	1.19818	1.2106	1.23179	1.24303	1.24043	1.24044	1.26315	1.27379	1.26974	1.26466	1.26936	1.28006	1.24947	1.25508	1.26918	1.29424	1.32105	1.33835	1.35339	1.38862	1.39709	1.39453	1.40189	1.43153	1.44467	1.46526	1.50739	1.53874	1.60876	1.67851	1.69037	1.69756	1.69762	1.68771	1.65168
31	0.98822	1.11637	1.1623	1.18565	1.28935	1.30462	1.37708	1.42007	1.48009	1.51504	1.59693	1.66567	1.72297	1.70758	1.82466	1.87663	1.92117	1.9709	2.002	1.9321	1.91801	1.97334	1.98964	2.00182	1.90264	2.01301	1.98052	1.87483	1.97491	1.99544
32	0.930855	1.04348	1.06663	1.11132	1.13752	1.14158	1.14997	1.15831	1.15896	1.18985	1.18064	1.16474	1.1655	1.16635	1.16676	1.15366	1.19038	1.17825	1.16821	1.18112	1.18403	1.19945	1.21068	1.19466	1.22806	1.26071	1.26753	1.24203	1.27159	1.28985	1.2749	1.30877	1.34	1.34387	1.39813	1.45606	1.53007	1.61814	1.73775	1.877	1.95242
33	0.972096	1.11596	1.16709	1.1989	1.18257	1.18754	1.24663	1.20846	1.23161	1.21483	1.23099	1.27027	1.25452	1.27986	1.28399	1.29005	1.3119	1.33284	1.36793	1.367	1.45618	1.47936	1.50273	1.57596	1.60695	1.69555	1.76367	1.85422	2.03723	2.17212	2.28246	2.38424	2.48272	2.56383	2.64423	2.72408	2.79471	2.84606	2.91892	2.97756	3.05354	3.09882	3.13621	3.17747	3.20937	3.23493	3.26366	3.26398	3.28403
34	1.01994	1.12204	1.21061	1.23603	1.31292	1.32153	1.33385	1.34561	1.38671	1.32637	1.31616	1.30753	1.31399	1.30716	1.32774	1.34463	1.34992	1.33552	1.35864	1.36294	1.36304	1.39361	1.40902	1.40009	1.42171	1.4173	1.45367	1.47984	1.43919	1.44601	1.48617	1.52782	1.57062	1.62806	1.69533	1.73222	1.73082	1.75452	1.80102	1.83274	1.89002	1.93867	1.93838	1.97718	1.98791	1.99451	2.02695	2.03636	1.99364
35	0.959281	1.04945	1.10807	1.15514	1.2115	1.2787	1.27232	1.27894	1.35514	1.38214	1.34887	1.37319	1.34016	1.36223	1.35715	1.37973	1.37505	1.37134	1.37792	1.37722	1.36772	1.34598	1.41287	1.35592	1.37816	1.40883	1.43663	1.46981	1.48901	1.48923	1.49789	1.55375	1.57844	1.62215	1.71896	1.76383	1.80237	1.86171	1.9035	1.96131	1.97001	2.00901	2.04697	2.08973	2.12521	2.15232	2.16352	2.18206	2.17692
36	0.92314	1.01379	1.09981	1.13055	1.13142	1.11915	1.1286	1.17442	1.18075	1.15283	1.13376	1.12231	1.13996	1.14023	1.14406	1.19112	1.18843	1.20446	1.19296	1.19734	1.21417	1.23524	1.24561	1.27023	1.28796	1.29078	1.3066	1.31177	1.29117	1.31381	1.40554	1.40077	1.42299	1.47349	1.50221	1.58215	1.65906	1.732	1.79226	1.82314	1.84397	1.8989	1.91084	1.92784	1.94757	1.93914	1.93268	1.96372	1.9619
37	0.965846	1.08211	1.14677	1.17455	1.20246	1.17452	1.17598	1.17231	1.19029	1.19692	1.19807	1.20071	1.20602	1.26095	1.263	1.2656	1.28296	1.29539	1.31264	1.32794	1.33986	1.34893	1.363	1.35569	1.40223	1.42473	1.43798	1.41296	1.41787	1.4625	1.50875	1.52558	1.54174	1.53072	1.57127	1.59677	1.62393	1.64052	1.63589
38	0.966862	1.06162	1.09997	1.12791	1.13574	1.1463	1.12892	1.14364	1.14893	1.15089	1.16875	1.16385	1.16845	1.19123	1.20518	1.24347	1.2645	1.27098	1.29392	1.30505	1.32639	1.34336	1.34666	1.34387	1.38346	1.37429	1.38446	1.38336	1.39852	1.40828	1.41403	1.44674	1.45828	1.46708	1.45798	1.47054	1.50199	1.53594	1.55577	1.56658	1.56978	1.60448	1.62062	1.66118	1.67334	1.68098	1.69401	1.69565	1.76025
39	0.930581	1.06232	1.08722	1.10232	1.10125	1.15343	1.11919	1.13737	1.16387	1.16111	1.1923	1.18633	1.17561	1.19511	1.20637	1.23974	1.25544	1.25976	1.26913	1.3233	1.32342	1.32508	1.34977	1.40756	1.44487	1.4874	1.54605	1.57062	1.63596	1.64384	1.65321	1.67775	1.68524	1.69388	1.7187	1.68126	1.70434	1.75318	1.74944	1.73418	1.74639	1.71695	1.69319	1.71311	1.6884	1.66579	1.6344	1.58535	1.57685
40	0.879953	1.02174	1.04973	1.09524	1.0999	1.04682	1.08303	1.09757	1.09678	1.08215	1.11166	1.10014	1.11452	1.14577	1.13131	1.16523	1.17698	1.20775	1.30873	1.34259	1.41401	1.57869	1.63619	1.74895	1.85482	1.98355	2.137	1.99536	2.01286	2.14613	2.17533	2.26445	2.36173	2.41523	2.46124	2.50451	2.55169	2.5877	2.64501	2.68892	2.72223	2.78514	2.8215	2.81237	2.8753	2.90105	2.91928	2.96203	2.96268
41	0.914521	1.0213	1.05527	1.06865	1.07694	1.05668	1.12083	1.1112	1.10647	1.10862	1.11261	1.11242	1.11135	1.0954	1.12322	1.11863	1.12921	1.1134	1.10953	1.10878	1.10868	1.14198	1.12369	1.12956	1.1307	1.13806	1.13402	1.14375	1.11998	1.13467	1.14429	1.18178	1.16586	1.18554	1.18902	1.17353	1.17067	1.17859	1.1684	1.17733	1.1741	1.15439	1.17895	1.16441	1.2216	1.29323	1.30199	1.34886	1.38091
42	0.945634	1.02824	1.02357	1.08878	1.08986	1.11726	1.1191	1.1351	1.12087	1.15187	1.12695	1.11502	1.07672	1.10364	1.17582	1.20379	1.18894	1.16288	1.22685	1.22601	1.25613	1.26108	1.26956	1.26977	1.29557	1.34587	1.37177	1.36689	1.40978	1.43785	1.46315	1.50552	1.54095	1.58614	1.63106	1.65228	1.69772	1.64709	1.65445	1.67743	1.63604	1.65081	1.66866	1.64116	1.62426	1.62862	1.66646	1.69377	1.71151
43	0.903569	1.02461	1.08262	1.13394	1.16534	1.22221	1.24575	1.2338	1.24193	1.22889	1.2248	1.23265	1.25699	1.2673	1.26136	1.29002	1.32404	1.33547	1.35376	1.39059	1.37355	1.39655	1.36161	1.39997	1.45153	1.44307	1.50146	1.53712	1.54491	1.57059	1.57023	1.57652	1.58654	1.61997	1.59589	1.62783	1.62376	1.61971	1.57344	1.57816	1.60341	1.59094	1.56848	1.60671	1.58822	1.63362	1.58746	1.61496	1.58038
44	0.893845	1.01216	1.07013	1.09559	1.12914	1.12759	1.21097	1.22758	1.26084	1.30088	1.32849	1.30567	1.28815	1.328	1.3476	1.33027	1.35477	1.35196	1.36574	1.41394	1.4029	1.43502	1.44684	1.45189	1.51941	1.49058	1.50659	1.56828	1.61587	1.60347	1.58503	1.6068	1.61394	1.60017	1.58421	1.61103	1.61994	1.60241	1.59986	1.58554	1.58456	1.54681	1.50829	1.52093	1.52476	1.55274	1.52539	1.52659	1.53196
45	0.921324	1.02504	1.08394	1.13164	1.22536	1.27503	1.26915	1.29967	1.32038	1.3892	1.42917	1.45194	1.43684	1.54202	1.59448	1.66936	1.75021	1.81616	1.8964	1.97168	2.02821	2.08627	2.15764	2.20339	2.25286	2.30578	2.35332	2.38407	2.40544	2.44583
46	0.925924	0.979653	1.09199	1.04996	1.15099	1.15912	1.14732	1.14822	1.16351	1.16074	1.15985	1.106	1.123	1.14152	1.13177	1.10519	1.11583	1.1195	1.12255	1.12721	1.12892	1.16239	1.17808	1.19649	1.19488	1.20869	1.20745	1.23046	1.22956	1.23689	1.25693	1.25413	1.26784	1.27563	1.24475	1.29115	1.2937	1.28485	1.2948	1.31143	1.34198	1.34247	1.33955	1.36259	1.40919	1.42498	1.44855	1.42167	1.424
47	0.944868	1.04424	1.13623	1.20583	1.26383	1.27821	1.30269	1.33436	1.35261	1.35561	1.43033	1.44814	1.46002	1.47925	1.52429	1.58616	1.64993	1.70457	1.75593	1.79402	1.85755	1.92094	1.97281	2.02587	2.07373	2.12435
48	0.92282	1.06052	1.05478	1.12165	1.13119	1.1477	1.12999	1.12581	1.10667	1.11092	1.14806	1.1383	1.12926	1.14679	1.15784	1.1533	1.16641	1.14769	1.16331	1.17942	1.17701	1.16381	1.16236	1.1596	1.18646	1.16968	1.16853	1.19898	1.21727	1.22549	1.25656	1.28114	1.28005	1.26694	1.29064	1.34449	1.34719	1.35193
49	0.887069	0.99996	1.10022	1.14714	1.10757	1.12633	1.16583	1.19496	1.19805	1.20366	1.2025	1.21145	1.25018	1.21456	1.23452	1.28016	1.29503	1.29112	1.35939	1.36445	1.35451	1.37131	1.38786	1.36682	1.40782	1.40402	1.46714	1.56207	1.58754	1.60552	1.61108	1.64269	1.68093	1.69625	1.69176	1.70484	1.74585	1.7986	1.85588	1.90455	1.97428	2.03324	2.07513	2.10763	2.15611	2.18404	2.21853	2.2321	2.25589
50	0.916308	1.04934	1.12425	1.15102	1.15477	1.19625	1.20496	1.23833	1.2546	1.26404	1.26213	1.26154	1.26331	1.29129	1.32599	1.34161	1.34796	1.39731	1.41421	1.44889	1.46191	1.4611	1.46715	1.49132	1.50408	1.5032	1.52165	1.53736	1.56897	1.60503	1.65174	1.68312	1.70288	1.71292	1.72197	1.72926	1.75464	1.77099	1.79036	1.7801	1.79698	1.79128
[truncated: 52 more columns]
