# Supplementary material for: A physicochemical perspective of aging from single-cell analysis of pH, macromolecular and organellar crowding in yeast
Source: eLife. 2020 Sep 29;9:e54707. doi: 10.7554/eLife.54707 (PMC7556870; doi:10.7554/eLife.54707)
Supplement: Figure 2—source data 1. [file elife-54707-fig2-data1.xlsx]

## Sheet: CrGE osmotic shock
		50mM NaPi					1M NaCl
cell #	mCerulean3	mCitrine	FRET channel	FRET/mCerulean3	cell #	mCerulean3	mCitrine	FRET channel	FRET/mCerulean3
1	1196.58	1511.77	708.35	0.591977	1	1639.16	2323.07	1091.24	0.665731
2	980.437	1185.79	513.801	0.524053	2	1545.66	2347.13	1069.11	0.691684
3	1213.97	1756.85	688.638	0.567263	3	1887.25	2754.89	1288.56	0.68277
4	1093.93	1448.34	642.164	0.587024	4	1602.3	2352.04	1022.68	0.638256
5	996.782	1250.89	533.194	0.534915	5	2352.07	2441.2	1340.8	0.570049
6	1064.6	1347.15	618.08	0.580573	6	1761.18	2506.03	1092.36	0.620242
7	1015.3	1341.68	585.557	0.576735	7	1825.65	2351.08	1111.33	0.608731
8	1047.52	1291.22	602.652	0.575311	8	1354.22	1942.13	881.907	0.651227
9	965.357	995.975	482.897	0.500226	9	1825.54	2889.85	1325.85	0.726279
10	828.017	912.29	440.645	0.532169	10	1626.19	2347.58	1095.88	0.673896
11	1057.34	1133.82	557.133	0.52692	11	1633.52	2797.69	1140.06	0.697918
12	1105.55	1378.87	640.203	0.579083	12	1464.31	2143.09	960.609	0.656014
13	1106.39	1334.66	621.445	0.561689	13	1521.34	2242.74	1011.03	0.664569
14	1105.33	1214.02	577.03	0.522041	14	1610.4	2162.1	964.67	0.599025
15	1109.55	1224.37	583.793	0.526152	15	1761.48	2305.24	1044.54	0.592988
16	1086.81	1317.12	608.784	0.560155	16	1755.98	2228.71	1033.5	0.588558
17	1055.77	1332.2	646.632	0.612474	17	1734.73	2177.75	1037.96	0.598341
18	914.347	1029.39	494.94	0.541304	18	1897.44	2642.29	1209.65	0.637518
19	1045.72	1402.67	647.655	0.619336	19	1598	2417.64	1081.04	0.676496
20	899.211	1072.56	508.108	0.56506	20	1475.49	2118.42	996.109	0.675104
21	1386.37	1266.23	686.505	0.495182	21	1402.21	2103.54	911.574	0.650098
22	923.625	902.259	460.686	0.49878	22	1550.42	1794.74	830.313	0.535541
23	1092.28	1175.74	555.362	0.508441	23	1446.96	1841.19	839.767	0.580367
24	1024.19	998.221	515.67	0.503493	24	1449.38	1944.91	885.567	0.610998
25	1569.14	1735.78	807.305	0.514489	25	1835.82	2553.12	1170.19	0.637419
26	1189.96	1583.48	709.486	0.596228	26	2000.19	3022.31	1359.39	0.679631
27	973.772	1036.96	508.301	0.521992	27	1735.96	2422.78	1120.28	0.645339
28	1116.15	1363.33	637.299	0.57098	28	1642.02	1948.1	916.739	0.558299
29	1021.49	1151.3	519.461	0.508535	29	1565.53	2076.86	959.103	0.612638
30	909.906	980.777	445.199	0.48928	30	1964.36	2562.89	1215.47	0.618761
31	1134.9	1002.79	537.432	0.473548	31	1798.47	2615.53	1184.98	0.658884
32	1190.87	1107.43	549.475	0.461405	32	1700.32	2453.74	1122.23	0.660009
33	1203.13	1373.19	675.709	0.561627	33	2240.96	3045.79	1408.53	0.628539
34	1239.27	1036.78	602.563	0.486225	34	1833.39	2533.19	1143.22	0.623555
35	1074.63	1143	539.8	0.50231	35	1884.07	3011.89	1278.99	0.678847
36	1164.38	1214.16	566.069	0.486157	36	1892.59	2145.72	1065.28	0.562869
37	1145.64	1053.92	528.318	0.461153	37	1913.64	3282.22	1386.55	0.724558
38	1059.89	1043.14	498.531	0.470362	38	2011.55	3034.56	1410.77	0.701337
39	908.901	1039.62	474.355	0.5219	39	1731.28	2372.88	1040.23	0.600845
40	1033.52	1170.47	559.646	0.541494	40	1852.61	2632.72	1135.01	0.612652
41	1224.45	1632.05	713.156	0.582432	41	1766.93	2468.87	1131.69	0.640485
42	1325.81	1778.89	789.106	0.595188	42	1348.7	1995.8	915.005	0.678434
43	1263.8	1532.15	717.073	0.567394	43	1670.4	2297.23	1099.37	0.658148
44	1262.68	1511.12	687.766	0.544687	44	1506.36	2212.02	1003.1	0.665905
45	862.997	1104.8	511.295	0.592464	45	1536.95	2313.51	1099.64	0.71547
46	1163.87	1727.87	730.116	0.627316	46	1381.89	1928.15	920.056	0.665793
47	869.892	1067.39	471.799	0.542365	47	1574.28	2293.53	1030.78	0.654759
48	804.7	957.649	447.508	0.556118	48	1665.61	2233.08	1018.84	0.611694
49	966.981	1234.09	547.813	0.566519	49	1852.93	2450.61	1196.01	0.645469
50	1170.81	1606.52	703.804	0.601126	50	1895.4	2387.55	1140.06	0.60149
51	869.52	981.596	477.202	0.548811	51	1721.72	2456.75	1094.73	0.635836
52	758.754	855.851	434.421	0.572545	52	1734.77	2621.56	1149.23	0.662469
53	950.227	1062.94	503.621	0.530001	53	1555.44	2461.83	1080.11	0.694404
54	957.091	1139	525.393	0.548948	54	1684.05	2341.12	1097.34	0.651607
55	1084.52	1019.63	523.598	0.482792	55	1953.78	2805.98	1294.99	0.662814
56	885.05	899.799	442.794	0.500304	56	1719.33	2129.52	1052.89	0.612384
57	710.372	866.84	403.328	0.56777	57	1597.68	2148.56	998.446	0.624935
58	873.573	1057.83	491.318	0.562424	58	1565.49	1778.29	971.844	0.620791
59	856.604	1004.92	461.868	0.539185
60	713.236	863.643	412.709	0.578643
61	806.058	844.796	406.292	0.504048
62	806.404	829.781	397.555	0.492997
63	653.545	756.192	363.158	0.555674
64	898.016	1061.04	501.193	0.558111

## Sheet: CrGE pH sensitivity
	pH5				pH5.5				pH6				pH6.5				pH6.7				pH7				pH 7.5				pH 8
cell #	mCerulean3	mCitrine	FRET channel	FRET/mCerulean3	mCerulean3	mCitrine	FRET channel	FRET/mCerulean3	mCerulean3	mCitrine	FRET channel	FRET/mCerulean3	mCerulean3	mCitrine	FRET channel	FRET/mCerulean3	mCerulean3	mCitrine	FRET channel	FRET/mCerulean3	mCerulean3	mCitrine	FRET channel	FRET/mCerulean3	mCerulean3	mCitrine	FRET channel	FRET/mCerulean3	mCerulean3	mCitrine	FRET channel	FRET/mCerulean3
1	1525.68	5.607	357.097	0.234058	1369.17	151.772	365.386	0.266866	1928.47	252.511	545.805	0.283024	3432.43	789.218	1226.97	0.357464	3694.79	903.537	1299.05	0.351589	2828.66	1050.64	1165.86	0.412159	2696.22	1551.55	1240.68	0.460158	2066.97	1831.01	1143.53	0.553243
2	1902.85	-43.885	392.759	0.206405	1149.98	151.656	309.467	0.269107	2598.69	409.008	775.613	0.298463	2531.38	529.54	884.862	0.349558	3504.73	861.489	1288.42	0.367624	2965.45	1068.63	1174.77	0.396153	2531.99	1219.08	1044.96	0.412702	1872.61	1722.58	1043.4	0.557187
3	1825.51	25.003	411.519	0.225427	1274.88	170.769	370.17	0.290357	1824.99	373.184	548.7	0.30066	2959.87	693.716	1022.5	0.345454	3567.54	850.621	1291.44	0.361997	2184.23	828.528	859.419	0.393466	2175.61	1400.58	1035.85	0.476118	1833.3	1394.59	940.439	0.512976
4	1510.69	39.522	383.513	0.253866	1304.5	178.356	383.852	0.294251	2268.32	344.122	728.905	0.321341	3573.96	907.532	1368.8	0.382992	3473.33	973.635	1329.66	0.38282	2799.01	1022.9	1073.16	0.383409	3386.78	1758.91	1459.57	0.430961	1801.84	1674.45	1000.83	0.555451
5	1046.72	57.645	324.318	0.309842	2268.32	344.122	728.905	0.321341	1703.85	348.652	542.818	0.318582	2793.52	839.318	1023.47	0.366374	2733.71	681.344	1011.3	0.369938	2515.3	903.836	1035.05	0.411504	2338.03	1481.99	1104.3	0.472322	1649.27	1586.96	922.232	0.559175
6	1329.97	33.802	316.609	0.238057	1167.13	147.272	309.372	0.265071	2137.45	308.267	662.386	0.309895	2353.42	693.223	818.571	0.347822	3066.4	898.475	1193	0.389056	3187.89	1325.6	1357.46	0.425818	2644.12	1723.24	1307.89	0.494639	1764.42	1534.39	978.928	0.554817
7	1043.12	22.355	250.847	0.240478	1303.61	140.673	351.912	0.269953	2202.26	321.767	631.594	0.286793	3914.52	887.927	1391.86	0.355563	2482.37	890.834	931.393	0.375203	2997.07	1178.24	1278.25	0.426501	2086.34	1323.81	1065.16	0.510541	2022.59	1717.64	1081.28	0.534601
8	1122.5	25.727	237.584	0.211655	1272	167.5	365.723	0.287518	2429.61	318.741	685.321	0.28207	3308.36	683.953	1134.94	0.34305	3730.3	957.205	1388.05	0.372101	3191.02	1181.98	1278.63	0.400695	2244.5	1618.44	1167.47	0.520147	2114	1741.86	1096.35	0.518614
9	1487.18	-24.651	308.94	0.207735	1455.19	183.715	381.275	0.26201	3265.86	369.083	878.031	0.268851	3732.58	782.174	1346.15	0.360648	3116.88	806.951	1114.85	0.357681	2402.89	800.13	928.809	0.386538	3169.46	2179.18	1632.61	0.515107	2142.35	1775.78	1079.06	0.503682
10	2182.47	-34.18	432.014	0.197947	1257.54	160.763	383.759	0.305166	2116.83	351.475	653.905	0.308907	3640.05	850.29	1246.07	0.342322	3789.16	919.108	1399.7	0.369397	2595.86	1253.79	1109.3	0.427337	2543.97	1423.32	1210.36	0.475777	2028.82	1574.93	1009.34	0.497502
11	1785.42	-57.296	313.295	0.175474	1691.54	131.515	439.506	0.259826	2199.27	354.264	677.027	0.307841	2535.64	688.542	913.552	0.360285	3639.05	968.54	1401	0.384991	2891.97	1067.83	1212.48	0.419257	2205.54	1414.85	1031.26	0.467577	1638.05	1552.09	937.576	0.572373
12	1654	-1.467	361.344	0.218467	2097.85	163.611	529.127	0.252223	2611.89	395.969	856.842	0.328054	3310.82	807.608	1239.72	0.374444	3254.03	891.367	1298.94	0.399178	2926.63	1077.73	1259.82	0.430467	1930.65	1298.55	908.83	0.470737	1915.49	1796.26	1094.69	0.571496
13	1764.91	10.591	406.208	0.230158	1658.26	128.316	453.496	0.273477	2173.06	360.071	674.017	0.31017	2717.53	943.37	1102.73	0.405785	3173.44	950.862	1322.18	0.416638	3133.35	1282.05	1400.23	0.44688	2242.87	1349.41	1079.34	0.481232	2025.67	1942.43	1132.48	0.559066
14	1168.72	-18.977	229.23	0.196137	1687.03	112.085	416.23	0.246724	2112.56	361.114	631.762	0.29905	3305.64	629.696	1170.29	0.354026	3348.55	868.142	1341.56	0.400638	2957.65	1171.42	1191.88	0.402981	2495.35	1716.51	1251.82	0.501659	1961.49	1873.44	1077.01	0.549076
15	3018.63	40.436	708.27	0.234633	1655.75	115.227	404.047	0.244027	2947.28	412.084	816.124	0.276907	2612.43	626.171	980.902	0.375476	2848.6	745.713	1160.59	0.407425	2904.14	1263.06	1272.83	0.438281	2536.56	1860.57	1319.22	0.520082	1797.37	1797.55	993.934	0.552995
16	1835.46	37.608	362.25	0.197362	2212.17	145.403	561.51	0.253828	3062.69	439.497	973.196	0.317758	3147.6	601.256	1088.81	0.345917	3693.87	1110.05	1506.9	0.407947	3216.62	1228.61	1293.96	0.402272	2555.54	1365.76	1141	0.44648	1640.31	1450.15	848.345	0.517187
17	1969.95	15.384	457.228	0.232101	2168.21	165.59	539.056	0.248618	2168.29	342.796	694.898	0.320482	2441.34	768.414	906.97	0.371506	3346.28	905.337	1258.81	0.376181	1646.65	1085.29	728.549	0.442444	3486.72	1577.7	1469.43	0.421436	1775.58	1575.59	917.963	0.516993
18	1792.13	50.422	416.064	0.232162	1990.35	174.378	563.251	0.282991	2029.93	284.76	621.667	0.30625	3275.4	690.445	1122.93	0.342836	4398.86	1392.68	1785.54	0.405909	2615.48	963.61	1064.09	0.406843	2258.34	1265.94	1053.66	0.466566	1891.96	1429.2	954.988	0.504761
19	1780.22	8.352	373.103	0.209583	1576.07	127.828	409.994	0.260137	3238.64	433.183	1028.56	0.31759	2360.97	626.352	820.186	0.347393	4625.71	1423.03	1894.23	0.409501	2766.64	1151.74	1185.92	0.428652	3006.82	1815.87	1501.75	0.499448	1576.87	1425.13	875.505	0.555216
20	1870.9	38.051	399.213	0.213381	1986.13	138.145	519.833	0.261732	2587.45	371.414	767.012	0.296436	2288.2	651.362	832.142	0.363667	2906.43	1048.78	1280.98	0.440741	3060.2	1244.25	1298.35	0.424271	2966.12	1556.93	1460.96	0.492549	1726.45	1348.71	848.007	0.491186

## Sheet: CrGE2.3 osm shock
	NaPi 50mM						NaCl 1M						Sorbitol 1.5M
cell #	mEGFP	FRET channel	mScarlet-I	FRET/mEGFP	NFRET	cell #	mEGFP	FRET channel	mScarlet-I	FRET/mEGFP	NFRET	cell #	mEGFP	FRET channel	mScarlet-I	FRET/mEGFP	NFRET
1	590.525	754.615	3156.38	1.27787	0.552728	1	732.047	1066.83	3852.92	1.45732	0.635228	1	1536.59	2389.41	7916.74	1.55501	0.685075
2	806.229	932.92	3749.43	1.15714	0.536578	2	907.339	1409.25	5057.79	1.55317	0.657845	2	1455.33	2179.04	7469.42	1.49728	0.660907
3	803.79	976.122	3975.03	1.2144	0.546088	3	944.473	1546.72	5412.22	1.63766	0.684116	3	1587.1	2379.57	7937.5	1.49932	0.670432
4	900.058	989.294	3838.97	1.09914	0.53221	4	945.188	1545.05	5401.72	1.63465	0.683783	4	1349.38	1804.45	6347.83	1.33724	0.616546
5	965.613	1054.13	4005.24	1.09167	0.536015	5	1119.68	1670.77	5807.49	1.49219	0.655204	5	1683.91	2381.47	7600.68	1.41425	0.665671
6	488.654	528.266	2075.85	1.08106	0.52451	6	1156.58	1768	5986.59	1.52865	0.6719	6	1309.44	1669.45	5542.78	1.27493	0.619678
7	807.372	884.655	3328	1.09572	0.539691	7	1086.96	1572.52	5276.57	1.44671	0.656618	7	1348.92	1874.1	6252.02	1.38934	0.645342
8	940.428	1151.15	4566.91	1.22407	0.555467	8	1302.91	1886.69	6242.81	1.44806	0.661536	8	1339.46	1931.84	6637.57	1.44225	0.647889
9	419.128	490.645	1965.43	1.17063	0.540587	9	1184.4	1770.94	5896.28	1.49522	0.67014	9	1419.06	2092.96	6889.23	1.47489	0.669384
10	703.671	804.541	3153.06	1.14335	0.540128	10	1451.98	2211.1	7134.51	1.52282	0.686983	10	1321.35	1919.39	6548.16	1.45259	0.65252
11	606.017	681.552	2705.62	1.12464	0.532259	11	1150.89	1612.3	5362.37	1.40092	0.64901	11	929.601	1328.59	4794.05	1.4292	0.629348
12	827.477	971.541	3888.76	1.1741	0.541599	12	1184.52	1660.08	5446.7	1.40148	0.653569	12	1408.5	2150.09	7098.47	1.52651	0.679979
13	943.154	1079.32	4121.49	1.14437	0.547432	13	1114.54	1528.5	5056.97	1.37142	0.643832	13	806.828	1184.18	4312.94	1.4677	0.634804
14	873.981	983.288	3779.99	1.12507	0.540984	14	1438.31	2156.58	6845.12	1.49938	0.687304	14	1484.19	2176.91	7128.09	1.46673	0.669283
15	842.026	929.679	3531.76	1.1041	0.539107	15	1131.81	1713.95	5432.3	1.51435	0.691226	15	1336.19	1842.45	6071.43	1.37888	0.646868
16	554.738	644.649	2503.99	1.16208	0.54697	16	1113.83	1672.6	5601.43	1.50167	0.669628	16	1035.68	1276.04	4255.86	1.23208	0.607796
17	778.433	932.592	3628.86	1.19804	0.554876	17	1204.57	1759.37	5710.88	1.46058	0.670795	17	1047.72	1335.38	4414.2	1.27456	0.620948
18	666.924	858.906	3566.69	1.28786	0.556897	18	1379.06	2064.1	6545.48	1.49674	0.687018	18	1463.33	1753.94	5734.88	1.1986	0.605456
19	941.989	1115.57	4232.98	1.18427	0.558663	19	1040.94	1649.23	5440.93	1.58436	0.692996	19	1362.44	2078.78	6894.32	1.52578	0.678272
20	837.037	1037.6	4167.35	1.23961	0.555556	20	1178.89	1796.18	5835.76	1.52362	0.684801	20	1244.16	1814.75	6107.17	1.45861	0.658352
21	926.415	1176.1	4633.9	1.26952	0.567635	21	1234.32	1866.2	6176.65	1.51193	0.675878	21	1257.29	1853.19	6108.83	1.47396	0.668687
22	809.1	1051.79	4065.2	1.29995	0.579945	22	1354.22	2167.57	6719.38	1.60061	0.718562	22	1379.73	2029.38	6753.04	1.47086	0.66484
23	539.593	728.079	3221.79	1.34931	0.5522	23	1069.71	1663.69	5413.73	1.55526	0.691336	23	1462.11	2408.79	7841.69	1.64747	0.711383
24	706.611	815.836	3308.33	1.15458	0.533591	24	937.382	1548.7	4988.65	1.65215	0.716172	24	1341.84	2097.55	6877.61	1.56319	0.690468
25	915.339	1102.08	4301.61	1.20401	0.5554	25	1227.75	2005.09	6275.28	1.63314	0.722373	25	920.344	1359.53	4934.81	1.4772	0.637937
26	761.608	890.095	3275.36	1.1687	0.563561	26	725.216	1173.23	4055.41	1.61776	0.684118	26	1627.62	2717.63	9166.18	1.6697	0.703591
27	689.655	765.888	2881.45	1.11054	0.543305	27	1037.78	1666.28	5191.6	1.60562	0.717869	27	1782.22	3029.12	9899.01	1.69963	0.721175
28	925.045	1064.06	4099.3	1.15028	0.546425	28	923.337	1446.18	4768.57	1.56626	0.689206	28	1557.57	2433.79	7829.86	1.56255	0.696918
29	689.577	877.126	3555.2	1.27198	0.560194	29	989.751	1648.34	5332.45	1.66541	0.717498	29	1334.5	1971.41	6563.02	1.47726	0.666139
30	729.873	967.243	3832.79	1.32522	0.578302	30	959.249	1639.8	5104.64	1.70947	0.741043
31	849.864	1050.91	4058.04	1.23656	0.565889

## Sheet: CrGE2.3 pH sensitivity
	pH5					pH5.5					pH6					pH6.5					pH6.7					pH7					pH7.3					pH7.5					pH8
cell #	mEGFP	FRET channel	mScarlet-I	FRET/mEGFP	NFRET	mEGFP	FRET channel	mScarlet-I	FRET/mEGFP	NFRET	mEGFP	FRET channel	mScarlet-I	FRET/mEGFP	NFRET	mEGFP	FRET channel	mScarlet-I	FRET/mEGFP	NFRET	mEGFP	FRET channel	mScarlet-I	FRET/mEGFP	NFRET	mEGFP	FRET channel	mScarlet-I	FRET/mEGFP	NFRET	mEGFP	FRET channel	mScarlet-I	FRET/mEGFP	NFRET	mEGFP	FRET channel	mScarlet-I	FRET/mEGFP	NFRET	mEGFP	FRET channel	mScarlet-I	FRET/mEGFP	NFRET
1	246.764	282.834	1281.31	1.14617	0.502995	460.95	349.756	1093.43	0.758772	0.492656	765.985	554.897	1427.42	0.724423	0.530672	988.103	631.685	1606.35	0.639291	0.501394	1244.14	906.648	2143.85	0.728737	0.555147	1033.37	558.848	1406.91	0.540802	0.463481	1143.19	772.736	2139.59	0.675945	0.494089	1346.66	1166.72	3428.86	0.866381	0.542955	1312.85	1188.22	3863.41	0.905069	0.527599
2	293.049	346.59	1585.73	1.1827	0.508431	273.758	201.842	689.364	0.737301	0.464626	766.42	517.234	1263.14	0.67487	0.525687	812.54	537.812	1376.96	0.66189	0.508449	408.076	314.164	778.145	0.769866	0.557514	1120.43	749.417	1887.51	0.668867	0.515332	1237.07	877.308	2194.6	0.709184	0.53245	1124.89	932.001	2762.78	0.828529	0.528675	855.309	838.779	2746.02	0.980674	0.547311
3	229.274	240.319	1029.58	1.04817	0.494631	364.53	299.149	1042.6	0.820643	0.485247	668.826	332.394	675.14	0.496981	0.494652	993.938	654.966	1650.39	0.658961	0.511383	1181.93	779.841	1859.87	0.659801	0.525978	1169.29	864.344	2100.75	0.739207	0.551491	1265.46	905.81	2373.14	0.715798	0.522699	868.104	688.691	1952.21	0.793328	0.529024	604.377	593.126	1835.15	0.981384	0.563193
4	234.078	274.404	1276.49	1.17228	0.501998	492.212	246.226	789.573	0.500244	0.394968	571.646	368.067	961.178	0.643872	0.496548	628.163	433.375	1197	0.689909	0.499781	720.11	339.353	692.138	0.471252	0.48068	1124.51	830.119	2037.42	0.738202	0.548426	1638.23	618.846	1633.33	0.377752	0.378318	1001.83	699.214	2015.15	0.697938	0.492107	2002.97	1958.44	6063.99	0.977768	0.561944
5	268.343	304.455	1345.95	1.13457	0.506599	724.489	365.729	1407.66	0.50481	0.362155	680.971	473.337	1167.68	0.695091	0.530817	919.642	539.511	1349.94	0.586653	0.48421	1025.14	644.703	1401.86	0.628895	0.537795	1173.01	808.131	2019.17	0.688938	0.525102	929.355	726.365	2009.6	0.78158	0.531508	1237.6	911.747	2738.15	0.736704	0.495285	880.274	956.713	3144.98	1.08684	0.574995
6	237.609	153.626	495.654	0.64655	0.447656	490.32	268.809	853.768	0.548232	0.415465	861.301	595.836	1542.18	0.691786	0.51699	738.427	494.328	1292.23	0.669434	0.506049	927.562	677.629	1500.49	0.730548	0.574386	804.522	550.77	1369.7	0.684593	0.524672	864.239	691.978	1951.49	0.800679	0.532835	1118.52	835.061	2461.78	0.746577	0.503236	740.065	738.092	2600.03	0.997334	0.532091
7	154.171	185.483	896.895	1.2031	0.498806	445.346	405.212	1606.68	0.909881	0.479036	552.716	394.346	1049.75	0.713469	0.517706	781.054	534.256	1480.71	0.684019	0.496791	590.282	380.958	887.387	0.645383	0.52637	832.001	523.343	1200.17	0.629017	0.523725	665.928	490.182	1401.66	0.736089	0.507368	488.595	347.868	1100.72	0.711976	0.474353	1250.82	1206.27	3960.69	0.964387	0.541954
8	188.134	157.439	609.95	0.836845	0.464763	364.479	314.705	1216.75	0.863438	0.47257	568.008	432.02	1165.32	0.760588	0.531011	816.374	537.414	1373.47	0.658294	0.507522	778.113	489.498	1117.18	0.629083	0.525011	984.19	499.193	1276.35	0.507212	0.445394	699.014	525.878	1470.18	0.752314	0.518749	476.789	349.638	1030.83	0.733318	0.498727	1004.36	1070.43	3585.12	1.06578	0.564108
9	175.88	162.015	674.884	0.921168	0.470254	361.813	314.815	1252.27	0.870104	0.467697	789.875	521.81	1311.32	0.660624	0.512718	878.712	597.624	1584.13	0.680114	0.506535	1626.66	1058.67	2428.09	0.650826	0.532697	674.944	451.544	1171.41	0.66901	0.507823	1135.14	937.237	2594.28	0.825658	0.546156	1081.2	923.537	2688.91	0.85418	0.541643	1262.51	1181.45	3833.94	0.935798	0.537002
10	264.071	266.71	1034.15	1.00999	0.510373	436.447	350.739	1229.29	0.803623	0.478842	839.549	398.135	881.819	0.474225	0.462719	981.694	689.186	1804.64	0.702037	0.517789	766.716	477.752	1100.7	0.623115	0.520056	1052.65	624.586	1368.41	0.593345	0.520405	1158.12	932.271	2556.21	0.804989	0.541836	823.246	644.775	1908.93	0.783211	0.514337	1115.31	1182.71	3880.5	1.06043	0.568509
11	310.594	335.961	1483.67	1.08167	0.494907	446.373	356.734	1206.01	0.799184	0.486205	633.192	364.841	884.689	0.576193	0.487462	997.612	690.669	1746.19	0.692322	0.523292	1149.89	700.071	1614.95	0.608813	0.513728	1134.6	730.782	1533.08	0.644088	0.554095	1386.67	1011.38	2653.94	0.72936	0.527209	887.31	662.477	1891.7	0.746613	0.511336	1158.65	1141.96	3657.66	0.985588	0.554716
12	255.004	247.953	1074.83	0.972349	0.473616	395.865	321.841	1132.21	0.813007	0.480734	584.958	257.6	471.271	0.440373	0.490623	805.059	546.803	1402.14	0.679209	0.514661	581.561	377.925	894.62	0.649846	0.523949	1247.09	788.108	1681.68	0.63196	0.54421	1068.12	712.092	2113.43	0.666676	0.473949	1383.08	1081.57	2920.72	0.782	0.538127	906.173	951.941	2950.54	1.05051	0.582176
13	232.709	178.479	679.089	0.766962	0.44897	457.176	346.64	1156.67	0.75822	0.476686	467.011	348.318	952.183	0.745845	0.522339	656.281	482.13	1300.57	0.73464	0.521858	886.688	633.317	1559.28	0.71425	0.538609	1166.51	850.411	2062.68	0.729025	0.548238	1319.29	900.303	2491.82	0.682416	0.496547	783.536	623.951	1813.09	0.796327	0.523494	1487.43	1607.14	4933.6	1.08049	0.593274
14	219.935	147.836	526.124	0.67218	0.434599	426.133	359.138	1217.73	0.842784	0.498555	604.512	416.596	1157.76	0.689144	0.497971	822.929	607.169	1688.46	0.737815	0.51509	892.335	640.259	1578.68	0.71751	0.539442	1396.06	1044.91	2676.21	0.748469	0.540587	1339.69	1140.45	2922.91	0.851278	0.576323	609.34	382.808	1008.48	0.628234	0.488336	757.701	749.755	2548.6	0.989513	0.539535
15	264.5	289.851	1353.85	1.09584	0.484369	431.574	367.68	1152.06	0.851951	0.521441	718.16	373.556	831.288	0.520157	0.48347	1141.88	836.964	2194.62	0.732967	0.528708	1295.27	867.145	1989.92	0.669472	0.540125	881.491	602.584	1467.61	0.683596	0.52979	645.465	481.046	1362	0.74527	0.513053	1055.7	753.005	2041.73	0.713276	0.512895	1222.26	1379.52	4375.84	1.12866	0.596507
16	260.063	303.001	1487	1.16511	0.487247	395.344	273.959	725.792	0.692964	0.511437	664.607	517.853	1554.47	0.779187	0.509486	1083.97	667.189	1770.41	0.615504	0.481618	1093.93	786.996	1777.73	0.719418	0.564344	1077.56	730.515	1754.37	0.677935	0.53131	1201.09	1086.57	3199.74	0.904656	0.554259	1116.48	1039.35	3168.59	0.930913	0.552589	1506.96	1717.18	5748.68	1.1395	0.583419
17	216.169	235.423	1136.63	1.08907	0.474943	442.08	381.562	1356.12	0.863106	0.492794	493.753	351.898	973.313	0.7127	0.507616	1266.55	793.537	1951.12	0.626536	0.504794	1208.59	811.851	1888.95	0.671736	0.537313	755.679	539.282	1380.08	0.713639	0.528075	1257.42	1005.16	2891.1	0.799379	0.527184	1350.17	1156.7	3514.93	0.856712	0.53097	896.199	981.33	3121.41	1.09499	0.586729
18	318.931	350.925	1750.54	1.10032	0.469657	481.17	406.251	1459.85	0.844298	0.48472	924.083	708.513	2082.8	0.76672	0.510703	899.139	592.919	1533.49	0.65943	0.504942	1251.3	849.755	1942.32	0.679098	0.54507	1201.52	872.491	2190.24	0.726156	0.537836	847.011	644.941	1677.36	0.761432	0.54108	1112.01	984.853	2953.1	0.885652	0.543473	1515.3	1721.42	5821.23	1.13602	0.579601
19	250.779	267.375	1244.66	1.06618	0.478574	296.704	249.185	914.236	0.839844	0.478444	508.292	374.345	1100.59	0.736476	0.500498	845.523	576.015	1511.63	0.681253	0.509504	691.19	500.29	1263.02	0.72381	0.535448	983.469	609.544	1369.01	0.61979	0.525317	210.995	163.739	475.632	0.776033	0.516869	1012.37	827.581	2473.43	0.817466	0.522987	1190.22	1246.46	4015.93	1.04725	0.570127
20	169.856	187.058	923.713	1.10127	0.472245	446.326	375.892	1348.32	0.842192	0.484551	696.875	358.004	820.509	0.513728	0.473444	824.757	574.034	1400.54	0.696004	0.534105	1336.53	1014.12	2414.54	0.758775	0.564527	895.795	633.083	1542.83	0.706728	0.538515	1148.06	807.165	2242.58	0.703069	0.503044	1032.16	850.698	2615.21	0.824191	0.517783	1260.9	1325.72	4268.82	1.05141	0.571425
21	296.186	299.154	1395.36	1.01002	0.46534	474.909	409.556	1459.92	0.862388	0.491862	591.052	469.272	1369.97	0.793961	0.521502	844.153	567.046	1349.34	0.671734	0.531309	744.429	391.861	891.276	0.526391	0.481077	566.462	376.025	902.673	0.663813	0.525855	824.295	626.081	1699.81	0.759535	0.528918	842.439	618.206	1835.47	0.733829	0.497154	1058.1	939.374	3057.29	0.88779	0.522283
22	226.55	214.862	1003.41	0.948409	0.450649	381.653	325.545	1179.52	0.852987	0.485203	808.704	652.884	1847.78	0.807321	0.534092	739.324	497.44	1211.72	0.672831	0.525561	1444.57	762.517	1658.31	0.527852	0.492662	711.739	489.874	1208.6	0.688278	0.528181	1526.76	984.194	2739.84	0.644627	0.481207	887.538	746.929	2328.9	0.841574	0.519529	1302.76	1313.99	4138.05	1.00862	0.565931
23	239.121	262.126	1158.8	1.09621	0.497962	496.687	411.31	1349.32	0.828107	0.502424	677.829	429.753	1155.52	0.634014	0.485591	966.852	682.577	1743.74	0.705979	0.525691	1194.66	889.196	2368.04	0.744312	0.528666	990.875	797.722	1747.32	0.805068	0.606256	951.018	813.805	2378.69	0.85572	0.541074	1207.27	1025.33	3073.44	0.849297	0.532292	1304.52	1299.85	4299.25	0.996416	0.54887
24	291.47	336.463	1574.08	1.15437	0.496738	499.859	329.285	931.769	0.658756	0.482496	514.766	373.375	995.722	0.72533	0.52152	387.841	254.818	650.383	0.657017	0.507363	1027.87	758.539	1693.06	0.73797	0.575005	1135.98	843.776	2171.05	0.742774	0.537288	566.942	441.705	1305.11	0.779101	0.513498	1095.24	893.562	2700.87	0.815863	0.51954	1142.36	1109.68	3603.51	0.971394	0.546933
25	252.359	279.189	1359.79	1.10632	0.4766	361.11	277.581	815.303	0.768688	0.511576	406.952	281.902	765.53	0.692716	0.505063	1129.38	783.428	2102.88	0.693677	0.50836	480.947	326.546	756.18	0.678965	0.541481	973.563	697.25	1777.47	0.716184	0.530036	1470.1	1065.28	2529.19	0.724632	0.552459	1145.41	887.486	2671.53	0.774822	0.507343	1079.99	1138.59	3727.64	1.05426	0.567468
26	193.73	195.257	906.999	1.00788	0.465806	419.257	365.914	1245.08	0.872768	0.506455	884.296	478.605	1253.97	0.541227	0.4545	1340.13	922.334	2280.62	0.68824	0.527578	1016.78	697.864	1602.11	0.686346	0.546777	1151.97	787.953	1750	0.684008	0.554961	895.571	712.087	2023.03	0.795121	0.529032	1232.51	1058.53	3179.84	0.858839	0.534693	1350.99	1371.27	4692.54	1.01502	0.544621
27	271.284	290.049	1321.03	1.06917	0.48451	456.393	394.853	1385.14	0.86516	0.496614	851.894	416.749	1006.2	0.489203	0.450131	836.153	517.344	1298.72	0.618719	0.496454	804.818	564.978	1217.1	0.701995	0.570848	814.46	570.71	1375.28	0.700722	0.539243	1345.41	1170.48	3308.32	0.86998	0.554797	931.024	777.874	2289.81	0.835504	0.532757	819.808	867.248	2966.24	1.05787	0.55614
28	250.346	217.667	853.578	0.869465	0.47087	188.502	149.295	533.918	0.792008	0.470598	931.569	473.391	1214.89	0.508165	0.444983	982.976	606.337	1535.33	0.616838	0.493562	683.779	485.035	1134.75	0.709345	0.550637	765.012	529.439	1236.83	0.692066	0.544286	1319.9	1037.2	2784.42	0.785812	0.541031	556.155	443.273	1267.03	0.797031	0.528057	1231.77	1167.95	4005.64	0.948185	0.525803
29	231.101	252.009	1077.32	1.09047	0.50506	351.28	310.896	1078.51	0.885038	0.5051	709.23	338.541	803.288	0.477336	0.44852	1248.96	850.277	2000.62	0.680791	0.537904	946.723	645.835	1515.24	0.682179	0.539224	844.805	629.288	1595.62	0.744891	0.542009	1361.94	1077.12	3010.16	0.790872	0.531975	1000.74	823.54	2415.11	0.822932	0.529732	1307.32	1331.46	4514.82	1.01847	0.548048
30	247.921	223.637	848.352	0.902049	0.48764	483.151	432.635	1377.33	0.895445	0.530349	560.535	420.381	1304.24	0.749964	0.491659	970.986	631.651	1583.15	0.650525	0.509459	918.89	662.509	1720.31	0.720988	0.526935	704.709	544.651	1354.26	0.772874	0.557523	1290.85	1058.08	2929.3	0.819671	0.544122	892.885	685.741	1926.59	0.768006	0.522839	1278.22	1191.15	3797.92	0.931884	0.54062

## Sheet: CrGE2.3 Cycloheximide 
CYCLOHEXIMIDE											DMSO
0 min						90 min					0 min					90 min
Cell #	mEGFP	FRET channel	mScarlet-I	FRET/mEGFP	NFRET	mEGFP	FRET channel	mScarlet-I	FRET/mEGFP	NFRET	mEGFP	FRET channel	mScarlet-I	FRET/mEGFP	NFRET	mEGFP	FRET channel	mScarlet-I	FRET/mEGFP	NFRET
1	616.453	779.063	3029.29	1.26378	0.570101	605.29	826.009	3418.68	1.36465	0.574214	751.108	1063.43	3931.56	1.41582	0.618835	611.316	749.169	2979.75	1.2255	0.555082
2	705.977	853.594	3219.1	1.2091	0.566225	583.354	779.347	3426.43	1.33598	0.551244	857.846	1025.28	3830.18	1.19518	0.565623	580.354	706.509	2778.63	1.21738	0.55636
3	609.113	708.826	2692.85	1.1637	0.553458	610.838	847.341	3659.38	1.38718	0.56675	826.575	1044.99	3664.53	1.26424	0.600431	485.226	575.865	2321.64	1.1868	0.542564
4	646.695	795.445	3007.78	1.23002	0.570345	630.301	822.632	3397.47	1.30514	0.562152	988.444	1154.58	4095.82	1.16808	0.573822	491.387	601.716	2440.66	1.22453	0.549448
5	677.847	829.643	3324.13	1.22394	0.552696	625.735	820.29	3563.97	1.31092	0.549295	1076	1132.62	4024.17	1.05262	0.544302	584.786	803.82	3251.58	1.37455	0.582926
6	576.32	656.866	2634.37	1.13976	0.533098	515.45	733.09	3205.26	1.42223	0.570338	692.517	727.464	2957.97	1.05046	0.508276	689.607	832.58	3152.46	1.20733	0.564677
7	672.679	804.284	3033.55	1.19564	0.563028	661.481	822.178	3392.03	1.24294	0.54888	730.748	815.159	3267.39	1.11551	0.527543	537.936	600.752	2327.4	1.11677	0.536901
8	659.986	894.386	3523.33	1.35516	0.586518	591.99	812.043	3484.11	1.37172	0.565426	798.128	1032.69	3952.54	1.29389	0.581427	664.507	801.375	3106.76	1.20597	0.55774
9	538.193	627.322	2569.98	1.16561	0.533404	563.537	783.917	3350.89	1.39107	0.570465	809.001	1019.83	3711.33	1.26061	0.588559	636.326	780.139	3167.96	1.22601	0.549468
10	719.35	901.22	3479.71	1.25283	0.569625	461.558	574.485	2639.35	1.24466	0.520496	904.395	1094.56	4039.76	1.21027	0.572641	631.41	752.515	3046.47	1.1918	0.542576
11	534.313	579.157	2225.11	1.08393	0.531156	538.852	675.642	2998.14	1.25385	0.531564	823.555	961.662	3434.9	1.1677	0.571767	796.871	976.362	3957.42	1.22524	0.549807
12	643.096	807.78	3356.72	1.25608	0.549791	509.532	660.422	2984.8	1.29613	0.535523	970.929	1128.77	4016.18	1.16256	0.571616	708.499	807.303	3110.94	1.13946	0.543777
13	800.49	952.975	3694.66	1.19049	0.554136	562.72	819.435	3464.25	1.4562	0.5869	899.108	1083.42	3744.77	1.20499	0.590443	871.287	1016.91	4083.03	1.16714	0.539151
14	753.384	911.605	3516.21	1.21001	0.560095	522.429	677.021	2724.61	1.29591	0.567461	794.32	965.542	3498.98	1.21556	0.579165	782.204	909.569	3524.01	1.16283	0.547844
15	595.136	654.235	2663.35	1.0993	0.519651	640.955	914.967	3928.77	1.42751	0.576585	839.925	1090.53	3766.2	1.29837	0.61315	673.293	774.178	2928.02	1.14984	0.551381
16	748.41	821.627	3181.26	1.09783	0.532482	326.045	425.636	1926.11	1.30545	0.537105	737.554	834.245	3234.15	1.1311	0.540153	656.918	810.189	3212.89	1.23332	0.557677
17	720.495	952.86	3858.61	1.32251	0.571476	362.488	470.238	2098.35	1.29725	0.539178	618.888	768.746	2741.14	1.24214	0.590217	769.679	934.804	3700	1.21454	0.553943
18	830.332	1034.54	3964.2	1.24593	0.570221	658.538	927.059	3951.31	1.40775	0.574707	517.11	567.006	2242.74	1.09649	0.52651	607.817	711.255	2748.88	1.17018	0.550251
19	844.625	1063.64	3989.44	1.2593	0.579435	567.809	800.593	3433.36	1.40997	0.573392	793.355	950.348	3656.44	1.19788	0.557981	695.307	861.748	3413.65	1.23938	0.559349
20	702.07	940.976	3698.63	1.34029	0.58394	520.545	758.593	3313.28	1.45731	0.577631	378.496	464.934	1720.15	1.22837	0.576206	717.602	933.282	3746.64	1.30056	0.569181
21	666.351	814.052	3153.49	1.22166	0.561571	605.004	806.918	3405.17	1.33374	0.562187
22						672.296	931.044	4049.67	1.38487	0.564261
23						720.478	1009.4	4275.09	1.40101	0.575147
