# Supplementary material for: A physicochemical perspective of aging from single-cell analysis of pH, macromolecular and organellar crowding in yeast
Source: eLife. 2020 Sep 29;9:e54707. doi: 10.7554/eLife.54707 (PMC7556870; doi:10.7554/eLife.54707)
Supplement: Figure 3—source data 1. [file elife-54707-fig3-data1.xlsx]

## Sheet: CrGE2.3 
RATIO								AGE							NFRET
cell #	0 h	10h	20h	30h	40h	50h	cell #	0 h	10h	20h	30h	40h	50h	cell #	0 h	10h	20h	30h	40h	50h
1	1.22421	1.22734	1.35094				1	0	7	11				1	0.541052	0.539829	0.562713
2	1.14086	1.22514	1.41992				2	0	6	9				2	0.52995	0.543853	0.585909
3	1.09454	1.15132	1.18162	1.16117	1.14572		3	0	6	13	18	23		3	0.523947	0.52781	0.526438	0.517283	0.513696
4	1.08503	1.11525	1.21354	1.12244	1.16768	1.12377	4	0	8	15	21	27	32	4	0.518129	0.515592	0.536664	0.517831	0.514157	0.505517
5	1.05443	1.12349	1.24075				5	0	8	12				5	0.51029	0.517545	0.545029
6	1.07557	1.16822	1.12939	1.09535	1.11269		6	0	8	14	19	24		6	0.513866	0.527841	0.520885	0.512276	0.514659
7	1.08068	1.05751	1.12315	1.01581	1.11203		7	0	11	20	29	35		7	0.515225	0.504457	0.522343	0.497593	0.509696
8	1.10351	1.24262	1.18229	1.1316	1.33432		8	0	7	13	19	19		8	0.524417	0.546227	0.529831	0.513583	0.542586
9	1.0617	1.13201	1.13605	1.1623			9	0	8	14	18			9	0.516449	0.523587	0.527922	0.53589
10	1.13419	1.20409	1.22974	1.17142	1.11727		10	0	8	14	20	26		10	0.535107	0.541532	0.534746	0.526357	0.506187
11	1.11352	1.08985	1.08348	1.18153	1.20665		11	0	7	12	17	20		11	0.525386	0.513295	0.512445	0.526775	0.535114
12	1.00307	1.08382	1.08944	1.18473			12	0	7	12	16			12	0.493179	0.504889	0.494301	0.530272
13	1.08997	1.10504	1.18631				13	0	6	12				13	0.525841	0.518878	0.538493
14	1.0126	1.07871	1.06528	1.08211	1.06824		14	0	7	13	19	21		14	0.492373	0.500209	0.493924	0.50031	0.489277
15	1.04038	1.12032	1.08845	1.19778			15	0	7	13	18			15	0.510623	0.527855	0.509774	0.539591
16	1.04505	1.13541	1.06083	1.00921	1.0485		16	0	6	12	17	22		16	0.511407	0.523896	0.49932	0.487554	0.505746
17	1.02034	1.02797	1.08865	1.16797			17	0	7	13	17			17	0.509191	0.501371	0.510904	0.528214
18	1.01136	1.06606					18	0	5					18	0.490261	0.491388
19	1.06199	1.15318	1.14226	1.14369	1.11049	1.12077	19	0	7	13	19	25	29	19	0.511004	0.521793	0.515627	0.520641	0.51183	0.517934
20	1.0109	1.04087	1.10244	1.0985			20	0	6	11	15			20	0.496819	0.497385	0.513231	0.508197
21	1.03791	1.01733	1.07296				21	0	5	11				21	0.494155	0.492937	0.507172
22	1.03189	1.15758	1.13373	1.16625	1.08972		22	0	7	13	18	23		22	0.503838	0.520422	0.514877	0.517156	0.510673
23	1.1426	1.14473	1.17694				23	0	5	10				23	0.525325	0.511931	0.514655
24	1.02732	1.05217	1.0996	1.08939	1.05707	1.05305	24	0	6	12	17	22	27	24	0.500947	0.496837	0.505522	0.498572	0.49817	0.491928
25	1.06307	1.04466	1.13676				25	0	6	10				25	0.508826	0.503056	0.51277
26	1.08796	1.12283	1.11755	1.12454	1.05305		26	0	7	14	20	24		26	0.515169	0.515048	0.511022	0.507523	0.497463
27	1.06032	1.12266	1.15623				27	0	6	10				27	0.504276	0.511265	0.523853
28	1.13428	1.11339	1.19764	1.29454			28	0	7	10	10			28	0.527201	0.518698	0.536919	0.541991
29	0.993717	1.10512					29	0	5					29	0.495708	0.513237
30	0.998011	1.0228	1.07313				30	0	7	10				30	0.499679	0.500767	0.505797
31	1.05643	1.04858	1.08964	1.10545			31	0	7	14	18			31	0.510457	0.49816	0.506874	0.509864
32	1.05368	1.06465	1.15138				32	0	6	11				32	0.50316	0.500829	0.525173
33	1.09766	1.09892	1.1909	1.22789	1.21663		33	0	6	13	17	19		33	0.517794	0.51006	0.525604	0.519359	0.505046
34	1.02944	1.00937	1.06006	1.04257	1.00269	1.03469	34	0	6	12	17	23	24	34	0.502141	0.489277	0.499823	0.492805	0.488962	0.502356
35	1.03349	1.13082	1.1828	1.14233	1.16911	1.13718	35	0	6	9	11	12	13	35	0.507438	0.505346	0.512344	0.496877	0.504602	0.48677
36	1.00286	1.0521	1.08415	1.06558	1.04563		36	0	6	13	18	23		36	0.498129	0.50596	0.502019	0.494469	0.499506
37	1.09261	1.07986	1.15197	1.17569			37	0	6	11	16			37	0.519016	0.507832	0.519526	0.522621
38	1.10299	1.0744	1.11051	1.16221	1.11405		38	0	7	13	19	22		38	0.518773	0.507435	0.509826	0.505716	0.499158
39	0.999271	1.04505	1.03766	1.00017	1.00341		39	0	6	12	19	24		39	0.500752	0.503984	0.492865	0.485674	0.493485
40	1.06376	1.09928	1.05329	1.10178	1.04045	1.06117	40	0	7	13	20	26	31	40	0.514159	0.512698	0.501349	0.513083	0.499237	0.497586
41	1.02767	1.06978	1.05139	1.18896	1.21701	1.19093	41	0	7	10	11	11	11	41	0.495387	0.495997	0.496246	0.508426	0.509129	0.493959
42	0.945487	0.976286	1.0792	1.04316	1.02516	1.07299	42	0	7	13	19	25	28	42	0.488177	0.487464	0.503874	0.49535	0.497475	0.499803
43	0.960773	0.987031	1.02071	1.0072	1.02305		43	0	7	14	20	25		43	0.49532	0.493744	0.492249	0.492975	0.492073
44	0.964408	1.02409	0.994767				44	0	7	11				44	0.486189	0.492431	0.476319
45	1.06252	1.13285	1.08896	1.0608	1.1065		45	0	6	12	18	23		45	0.504923	0.50915	0.502704	0.498302	0.503104
46	0.98592	0.976486	1.03475	1.03589			46	0	7	14	18			46	0.491593	0.486313	0.502455	0.505318
47	1.08582	1.09506	1.10648	1.12109			47	0	6	12	15			47	0.522459	0.516854	0.525793	0.525309
48	1.08816	1.11107					48	0	5					48	0.517583	0.519535
49	0.925559	0.945245	1.02117	0.996532	0.99182		49	0	6	13	19	24		49	0.475896	0.475212	0.491143	0.480793	0.480607
50	1.00405	1.03826	0.996275	1.02056			50	0	6	11	14			50	0.49943	0.491113	0.488603	0.495758
51	0.988696	0.993036	1.00553	1.02485			51	0	7	13	19			51	0.49184	0.485402	0.493387	0.493917
