# Supplementary material for: A physicochemical perspective of aging from single-cell analysis of pH, macromolecular and organellar crowding in yeast
Source: eLife. 2020 Sep 29;9:e54707. doi: 10.7554/eLife.54707 (PMC7556870; doi:10.7554/eLife.54707)
Supplement: Figure 4—source data 1. [file elife-54707-fig4-data1.xlsx]

## Sheet: Volume Calculations
	Data for Figure 4C		bold are values boxed in figure 4C
	Old Cells						Young Cells
	Plasma membrane (nm3)	Vacuoles (nm3)	Nuclei (nm3)	Lipid droplets (nm3)			Plasma membrane (nm3)	Vacuoles (nm3)	Nuclei (nm3)	Lipid droplets (nm3)
old_1	8.87e+08	146000000	135000000	51100000		young_1	1330000000	267000000	192000000
old_2	309000000	75000000		8.28e+06		young_2	941000000	31700000	185000000	19000000
old_3	1230000000	755000000		5930000		young_3	149000000		21700000	2.03e+06
old_4	881000000	193000000	180000000			young_4	1220000000	4.69e+07	271000000	6520000
old_5	674000000	4.48e+08	46200000	12800000		young_5	1190000000	284000000
old_6	701000000	127000000	210000000	5400000		young_6	655000000	107000000	241000000	19500000
old_7	818000000	408000000		4400000		young_7	1170000000	71800000	195000000	8900000
old_8	1130000000	307000000	133000000	9230000		young_8	1160000000	223000000	160000000	9850000
old_9	684000000	2.3e+08		7000000		young_9	1220000000	97400000	97400000	13500000
old_10	831000000	4.48e+08	46200000	12700000		young_10	353000000	33000000	70900000	6750000
old_11	800000000	322000000		5000000
old_12	1290000000	500000000	167000000
old_13	1090000000	441000000	91000000	18000000
old_14	1734000000	346000000	196000000	2.03e+07
	% Volume
	Old cells							Random (Young) cells
	Cytosol	Vacuoles	Nucleus	Lipid droplets			Cytosol	Vacuoles	Nucleus	Lipid droplets
old_1	62.5592	16.46	15.2198	5.76099		young_1	65.4887	20.0752	14.4361
old_2	73.0485	24.2718		2.67961		young_2	75.6089	3.36876	19.6599	1.36242
old_3	37.7509	61.3821		0.866959		young_3	83.8789		14.5638	1.55738
old_4	57.6617	21.9069	20.4313			young_4	73.3806	3.84426	22.2131	0.562069
old_5	24.7774	66.4688	6.8546	1.89911		young_5	76.1345	23.8655
old_6	51.1555	18.117	29.9572	0.770328		young_6	52.797	8.77049	36.7939	1.63866
old_7	49.5844	49.8778		0.537897		young_7	76.7186	5.88525	16.6667	0.729508
old_8	60.2451	27.1681	11.7699	0.816814		young_8	66.1336	19.2241	13.7931	0.849138
old_9	65.763	33.6257		0.611247		young_9	82.6969	8.15574	7.98361	1.16379
old_10	39.0012	53.911	5.55957	1.52828		young_10	68.6544	9.34844	20.085	1.91218
old_11	57.2683	40.25		2.48166		avg	72.1492	11.3931	18.4661	1.22189
old_12	48.2946	38.7597	12.9457
old_13	49.5413	40.4587	8.34862	1.65138
old_14	32.7174	42.2983	23.9609	1.02339
		Old vacuoles	Old nuclei				Young vacuoles	Young nuclei
	Best-fit values					Best-fit values
	Slope	0.9045	0.1128			Slope	0.3014	0.2874
	Y-intercept	984921	757015			Y-intercept	212065	264471
	X-intercept	-1088860	-6709260			X-intercept	-703677	-920346
	1/slope	1.106	8.863			1/slope	3.318	3.48
	Std. Error					Std. Error
	Slope	0.6275	0.1067			Slope	0.1203	0.08937
	Y-intercept	1521573	262882			Y-intercept	352263	253622
	95% Confidence Intervals					95% Confidence Intervals
	Slope	-0.4766 to 2.286	-0.1331 to 0.3588			Slope	0.02387 to 0.5789	0.08128 to 0.4934
	Y-intercept	-2364038 to 4333880	150807 to 1363223			Y-intercept	-600255 to 1024384	-320382 to 849324
	X-intercept	-infinity to 1111679	-infinity to -438528			X-intercept	-41305700 to 1077305	-9922727 to 683762
	Goodness of Fit					Goodness of Fit
	R squared	0.1589	0.1227			R squared	0.4395	0.5638
	Sy.x	1952183	307565			Sy.x	349515	338473
	Is slope significantly non-zero?					Is slope significantly non-zero?
	F	2.078	1.119			F	6.272	10.34
	DFn, DFd	1, 11	1, 8			DFn, DFd	1, 8	1, 8
	P value	0.1773	0.321			P value	0.0367	0.0123
	Deviation from zero?	Not Significant	Not Significant			Deviation from zero?	Significant	Significant
	Equation	Y = 0.9045*X + 984921	Y = 0.1128*X + 757015			Equation	Y = 0.3014*X + 212065	Y = 0.2874*X + 264471

## Sheet: SA Calculation
	Data for Figure 4D		bold are values boxed in figure 4D
	Surface Area
	Old cells						Young cells
	Plasma Membrane	Vacuoles	Nucleus	Lipid droplets			Plasma Membrane	Vacuoles	Nucleus	Lipid droplets
old_1	201000	1540000	869046	152000000		young_1	2840000	1255000	1060000
old_2	1739000	1710000		319363		young_2	2450000	401292	897386	298561
old_3	2280000	1580000	1040000			young_3	213396		80855	6771
old_4	1688000	5300000	577412	450922		young_4	3780000	1660000	1660000	194529
old_5	2.05e+06	1260000	1650000	257796		young_5	1710000	1140000	1350000
old_6	3390000	3600000		176932		young_6	2280000	1.045e+06		1660000
old_7	3860000	7900000	1200000	752578		young_7	3000000	995370	1370000	2760000
old_8	2110000	3750000		136845		young_8	3680000	1590000	757758	186995
old_9	2420000	2420000	1010000	337344		young_9	3700000	829699	1300000	163219
old_10	1930000	5300000	577412	450922		young_10	855032	330777	392037	200104
old_11	2080000	1900000		205910
old_12	2760000		1120000
old_13	3030000	1530000	1000000	685181
old_14	2680000	1660000	1110000	310774

## Sheet: Interorganelle distance
	Data for Figure 4E, F
intraorganelle distance (nm)					Bold values are cells presented in Figure 4E
old_1	old_2	old_3	old_4	old_5	old_6	old_7	old_8	old_9	old_10	old_11	old_12	old_13	old_14		young_1	young_2	young_3	young_4	young_5	young_6	young_7	young_8	young_9	young_10
1045	918	1214	1045	1177	1285	372	1089	1903	396	308	107	698	1289		1563	2003	1799	1195	2053	1317	192	866	1010	986			Table Analyzed
435	1079	412	1851	1861	371	689	2154	821	410	576	317	892	796		2093	1667	2335	465	417	2045	72	1780	1636	275
1832	1148	801	1470	893	166	898	859	111	200	454	488	309	688		1481	984	2646	890	1572	2611	240	2298	2262	158			Column A (all old cells)	Old cell
215	323	821	102	1201	571	302	1177	1029	112	615	215	615	449		680	1468	846	954	573	3001	445	1901	2614	503			vs.	vs.
1573	405	531	195	1514	210	463	254	690	381	224	157	483	361		1672	769	1182	533	1532	3296	108	445	1394	278			Column B (all young cells)	Young cell
156	288	112	361	346	341	621	43	188	493	405	327	434	713		476	336	831	741	1640	1437	60	686	946	161
1470	444	62	112	356	547	467	825	237	24	776	293	840	845		1577	800	1040	1143	703	1714	782	336	858	190			Kolmogorov-Smirnov test
166	357	512	224	504	220	90	1011	85	219	781	596	421	63		448	698	882	372	770	1804	204	1408	1307	35			P value	<0.0001
625	162	80	112	263	850	376	210	317	68	83	170	116	40		1543	530	1014	766	119	680	1046	1371	1387	190			Exact or approximate P value?	Approximate
93	473	86	53	249	156	157	478	178	88	136	308	305	195		353	760	1019	1006	186	415	469	1540	834	172			P value summary	****
78	37	106	376	151	224	67	78	492	166	718	293	116	205		1617	805	1096	1347	1750	523	589	3261	826	298			Significantly different (P < 0.05)?	Yes
181	518	302	664	44	141	86	84	159	92	230	1338	409	766		476	505	1167	220	830	619	1251	2129	1451	365			Kolmogorov-Smirnov D	0.6481
249	229	495	97	68	415	447	205	77	151	352	1670	135	1078		1298	897	1188	437	986	1883	601	228	705	1118
180	332	231	449	98	313	174	151	270	49	278	527	199	258		346	637	1447	360	114	1467	437	385	593	114
185	239	61	649	454	215	177	122	323	127	865	410	264	83		496	703	1351	1003	758	330	541	338	713	286
88	312	51	156	234	30	312	83	130	136	362	88	167	405		836	122	3308	1078	680	49	481	204	890	1174
122	527	213	586	219	1245	305	176	410	79	405	2032	180	302		20	625	3176	1054	96	572	397	1768	1034	1247
254	83	492	400	273	508	454	198	362	14	32	1187	58	464		1024	423	1126	312	234	1588	469	1852	842	275
75	107	547	1314	224	552	470	161	338	195	73	352	13	483		516	280	1437	300	1365	1311	505	673	682	389
123	244	99	425	478	327	872	136	579	303	224	323	58	449		958	178	729	385	1052	523	529	3020	994	723
303	166	467	83	312	102	161	175	236	49	464	1040	122	230		285	198	994	1098	2039	559	649	2490	72	515
146	73	512	679	200	483	116	395	468	361	327	1094	19	361		294	576	790	1435	505	1293	709	2165	1251	503
224	102	405	1050	376	620	35	381	260	78	273	303	74	1739		747	1167	769	585	2039	1281	734	1781	1371	685
410	219	425	166	483	72	640	571	468	146	288	35	48	840		238	1187	1208	842	463	553	1060		537	348
400	180	283	654	615	610	248	229	260	54	449	205	354	796		625	377		701	2063	722	2660		537	1024
366	254	460	918	757	78	22	185	314	24	55	826	634	552		306	143		1504	2033	2238	2755		385	1097
3488	307	97	298	840	58	45	92	536	210	114	835	125	473		653	2437		701	415	2983	2505		1179	632
2364	98	367	591	215	45	209	341	309	175	73	264	45	192		836	912			547	2604	1636		1043	2919
420	146	164	454	703	107	135	649	430	34	137	283	122	269		938	1840			1991	2105	1276		232	1001
2535	161	251	122	840	337	318	473	232	15	78	894	228	434		2127	632			1822	1281			312	811
1846	390	94	576	215	322	170	151	299	14	171	1055	125	39		1998	1463							970	620
835	147	392	571	703	136	125	44	318	20	210	454	264	249		1686	368							826	673
	342	51	48	390	108	109	1094	401	19	251	167	109	386										209	690
	346	61	395	1436	200	115	200	314	107	493	1148	309	142										746	1417
	141	109	390	1284	190	177	1094	497	190	391	469	128	488										553	761
	274	238	97	952	218	231	1846	367	14	659	1455	553	24										80	863
	659	148	640	175	152	54	327	507	39	24	1382	103	410										184	951
	43	502	732	537	845	39	190	589	107	107		74	377										569	910
	283	373	122	200	693	1082	127	372	97	835		409	171											1206
	234	68	581	195	293	385	53	879	20	610		306	58
	293	450	361	972	49		356	483	34	269		405	112
	210	74	200	801	43		542		53	157		244	351
	122	87	87	727	312		371		63	688		563	34
	293	1046	503	1084	78		517		92	347		59	142
	430	708	991	664	254		138		127	134		634	385
	547	164	239	591	263		53		43	884		402	991
	268	75	234	1030	32		454		185	1509		43	37
		360	180	1050	24		361		68	103		77	889
		305	200	532	107		83		13	1138		570	341
		235	1055	517	185		158		83			602	293
		260	170	1099	552		219		298			167	1783
		575	630	1221	562		200		34			170	918
		1925	371	503	1119		1079		24			367
			234	776	83		117		141			366
			459		156		381		1279			650
			147		297		786		478			1542
			1045		259		297		469			1156
			937		327		596		263
			137		351		557
			53		302		283
			356		1099		24
			928		1314		88
			815		73		313
			1441		556		205
					1260		1177
					493		801
					244
					73
					371
					1172
					161
					635
					127
					215
					195
					454
					430
					449
					136
					1038
					788
					120
					361
					130
					123
					731
					390
